# Supplementary material for: Delivery of Bioactive Compounds to Improve Skin Cell Responses on Microfabricated Electrospun Microenvironments
Source: MDPI journal article supplement (doi:10.3390/bioengineering8080105), 2021-07-27
Supplement: s1 [file s1]

**Table S1.** Supplements used to prepare DMEM and Green's cell culture media. Reagents were purchased from Sigma (UK) unless specified.

| Supplement                             | DMEM (6546)           | Green's media       |
|----------------------------------------|-----------------------|---------------------|
| Foetal calf serum<br>(Biowest Biosera) |                       | 10% v/v             |
| Penicillin- streptomycin               | 100 IU/mL - 100 mg/mL |                     |
| Amphotericin B                         | 0.625 µg/mL           |                     |
| Ham's F12 (N4888)                      |                       | 3:1 v/v             |
| DMEM AQ media (D0819)                  | N/A                   | DMEM AQ : Ham's F12 |
| L-glutamine                            | 2 mM                  | N/A                 |
| Bovine insulin                         |                       | 5 µg/mL             |
| Adenine                                |                       | 6.25 µg/mL          |
| T/T                                    |                       | 10 ng/mg            |
| Hydrocortisone                         | N/A                   | 0.4 µg/mL           |
| EGF                                    |                       | 10 ng/mL            |
| Cholera toxin                          |                       | 8.5 ng/mL           |
